# Supplementary material for: Do we care? Reporting of genetic diagnoses in multidisciplinary intellectual disability care: a retrospective chart review
Source: PubMed Central journal article supplement (PMC11403852; doi:10.1186/s13023-024-03323-6), 2024-09-16
Supplement: 13023_2024_3323_MOESM1_ESM.pdf [file 13023_2024_3323_MOESM1_ESM.pdf]

## Additional file 1

Factors associated with availability of information on genetic etiology in care files using univariate analyses ( $N = 380$ ).

| <b>Variable</b>            | <b>Effect size</b> | <b><i>p</i></b> |
|----------------------------|--------------------|-----------------|
| Age                        | $r = -0.16$        | .002            |
| Sex                        | $X^2 = 0.049$      | 0.83            |
| Level of ID                | $X^2 = 28.898$     | <.001           |
| Location of receiving care | $X^2 = 29.567$     | .08             |
| Medical care on site       | $X^2 = 0.349$      | .55             |
| Legal representative       | $X^2 = 17.323$     | <.001           |

*ID, intellectual disability*
