# Supplementary material for: Do we care? Reporting of genetic diagnoses in multidisciplinary intellectual disability care: a retrospective chart review
Source: PubMed Central journal article supplement (PMC11403852; doi:10.1186/s13023-024-03323-6), 2024-09-16
Supplement: 13023_2024_3323_MOESM2_ESM.pdf [file 13023_2024_3323_MOESM2_ESM.pdf]

## Additional file 2

Genetic diagnoses as reported in the electronic care system.

| Reported genetic diagnosis                         | OMIM           | N         | Genetic test results unavailable |
|----------------------------------------------------|----------------|-----------|----------------------------------|
| Down syndrome                                      | 190685         | 15        | 15                               |
| Fragile X syndrome                                 | 300624         | 8         | 7                                |
| Smith-Magenis syndrome                             | 182290; 607642 | 5         | 3                                |
| 22q11.2 deletion syndrome                          | 188400; 192430 | 4         | 1                                |
| Epileptic encephalopathy                           | 176260         | 2         |                                  |
| Prader-Willi syndrome                              | 176270; 615547 | 2         | 1                                |
| Pitt-Hopkins syndrome                              | 610954         | 2         | 1                                |
| 18p duplication syndrome                           | N.A.           | 1         |                                  |
| 18p deletion syndrome                              | N.A.           | 1         |                                  |
| ZNF292 syndrome                                    | 619188         | 1         |                                  |
| Miller-Dieker syndrome                             | 247200         | 1         |                                  |
| 1q21.1 microdeletion syndrome                      | 612474         | 1         |                                  |
| Trisomy 9p                                         | N.A.           | 1         |                                  |
| PURA syndrome                                      | 616158         | 1         |                                  |
| Alpha-thalassemia-intellectual disability syndrome | 141750         | 1         |                                  |
| Tuberous Sclerosis Complex                         | 191100; 613254 | 1         | 1                                |
| Schindler disease                                  | 609241; 609242 | 1         | 1                                |
| Williams syndrome                                  | 194050         | 1         | 1                                |
| DeSanto Shinawi syndrome                           | 616708         | 1         | 1                                |
| WDFY3-related syndrome                             | N.A.           | 1         |                                  |
| <b>Total</b>                                       |                | <b>51</b> | <b>32</b>                        |
